# Supplementary material
Source: Springer Nature journal article supplement (https://www.springermedizin.de/resource/supplementary/12936_2009_1230_MOESM1_ESM.pdf/9549278)
Supplement: MOESM1 [file 9549278]

Level A

Level B

Level C

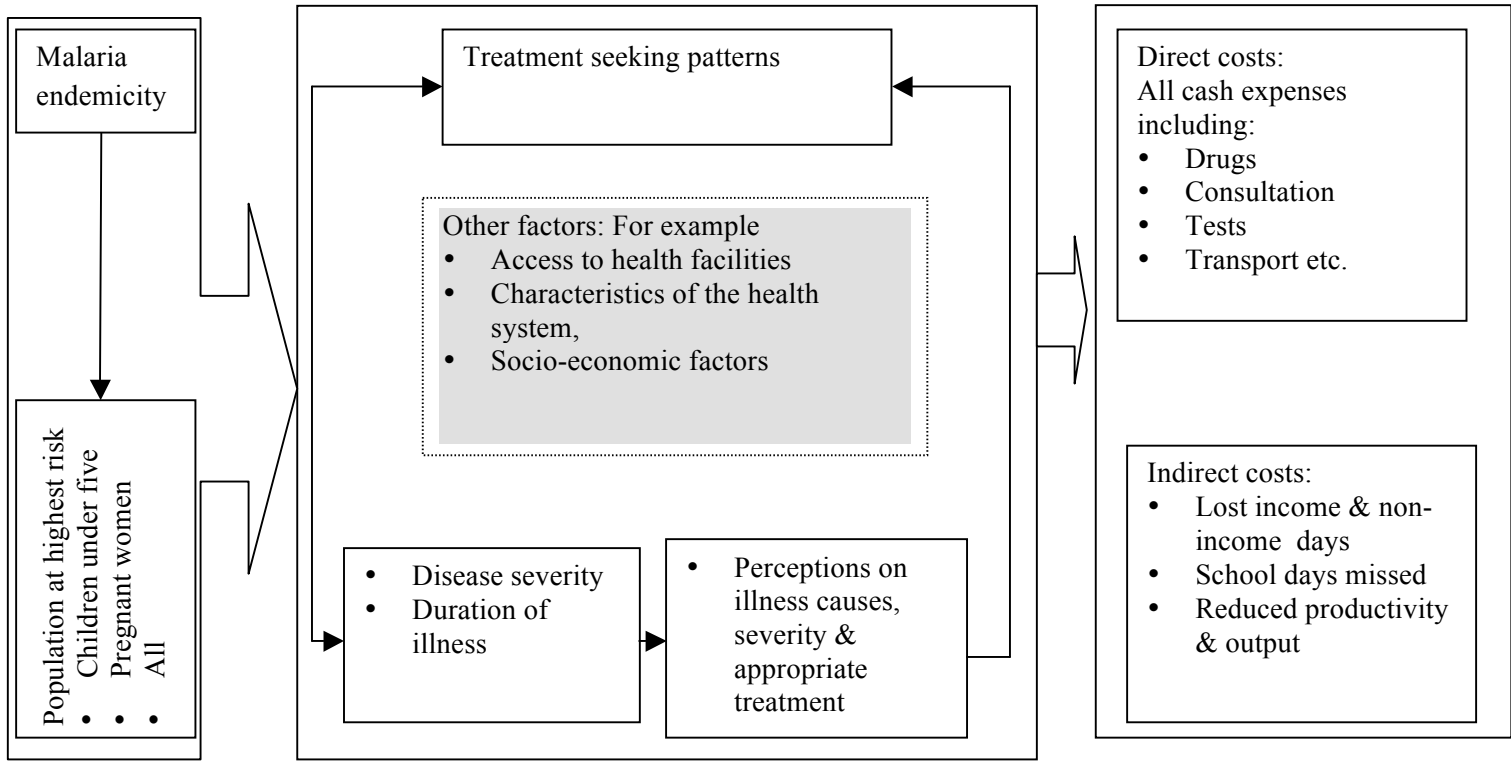

Malaria endemicity

Population at highest risk

- Children under five
- Pregnant women
- All

Treatment seeking patterns

Other factors: For example

- Access to health facilities
- Characteristics of the health system,
- Socio-economic factors

- Disease severity
- Duration of illness

- Perceptions on illness causes, severity & appropriate treatment

Direct costs:  
All cash expenses including:

- Drugs
- Consultation
- Tests
- Transport etc.

Indirect costs:

- Lost income & non-income days
- School days missed
- Reduced productivity & output
